# Supplementary material for: Cryptic prophages help bacteria cope with adverse environments
Source: PubMed Central journal article supplement — Nat Commun. 2010 Dec 21;1:147–. doi: 10.1038/ncomms1146 (PMC3105296; doi:10.1038/ncomms1146), 2010-12-21
Supplement: ncomms1146-s1.pdf [file ncomms1146-s1.pdf]

## **Supplementary Information**

### **Cryptic Prophages Help Bacteria Cope with Adverse Environments**

Xiaoxue Wang<sup>1</sup>, Younghoon Kim<sup>1</sup>, Qun Ma<sup>1</sup>, Seok Hoon Hong<sup>1</sup>, Karina Pokusaeva<sup>2</sup>, Joseph M. Sturino<sup>2</sup>,  
and Thomas K. Wood<sup>1\*</sup>

Department of Chemical Engineering<sup>1</sup> and Department of Nutrition & Food Science<sup>2</sup>,

Texas A & M University, College Station, Texas 77843

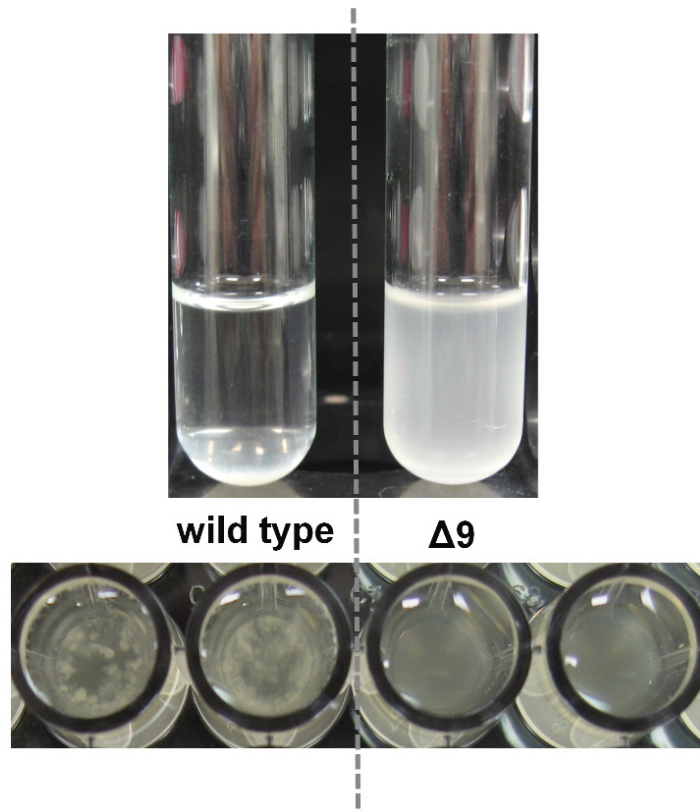

**Supplementary Figure S1. Prophage genes increase cell aggregation.** Aggregation for the multiple prophage-deletion strain ( $\Delta 9$ ) and the wild-type strain. Bacteria were cultured at 30°C for 48 h in M9C medium in glass tubes (top) and in LB medium in 96-well polystyrene plates (bottom).

**Supplementary Table S1.** List of chemicals that affect the cellular respiration of  $\Delta 9$  vs. wild-type BW25113 using Biolog PM Plates 9 and 11-13. Area difference is the average area under the growth curve for  $\Delta 9$  vs. the wild-type strain ( $n = 3$ ); i.e., negative values indicate the wild-type strain respire more robustly than  $\Delta 9$ .

| PM Plate                          | Chemical                | Area Difference | Mode of action                                           |
|-----------------------------------|-------------------------|-----------------|----------------------------------------------------------|
| <b>Fluroquinolones</b>            |                         |                 |                                                          |
| PM11                              | lomefloxacin            | -21444          | DNA unwinding, gyrase (GN), fluoroquinolone              |
| PM11                              | ofloxacin               | -35026          | DNA unwinding, gyrase (GN), fluoroquinolone              |
| PM13                              | oxolinic acid           | -35915          | DNA unwinding, gyrase (GN), quinolone                    |
| PM12                              | novobiocin              | -22377          | DNA unwinding, gyrase (GN), quinolone                    |
| PM11                              | nalidixic acid          | -10711          | DNA unwinding, gyrase (GN), quinolone                    |
| PM11                              | enoxacin                | -4881           | DNA unwinding, gyrase (GN), fluoroquinolone              |
| <b><math>\beta</math>-lactams</b> |                         |                 |                                                          |
| PM13                              | moxalactam              | -27479          | wall, lactam                                             |
| PM13                              | azlocillin              | -19146          | wall, lactam                                             |
| PM13                              | cefuroxime              | -25228          | wall, cephalosporin second generation                    |
| PM11                              | cephalothin             | -24343          | wall, cephalosporin first generation                     |
| PM11                              | nafcillin               | -10824          | wall, lactam                                             |
| PM11                              | ceftriaxone             | -22421          | wall, cephalosporin third generation                     |
| PM13                              | ampicillin              | -5427           | wall, lactam                                             |
| PM11                              | cloxacillin             | -4505           | wall, lactam                                             |
| PM11                              | amoxicillin             | -10776          | wall, lactam                                             |
| <b>Ribosomal inhibitors</b>       |                         |                 |                                                          |
| PM11                              | kanamycin               | -21349          | protein synthesis, 30S ribosomal subunit, aminoglycoside |
| PM11                              | gentamicin              | -9166           | protein synthesis, 30S ribosomal subunit, aminoglycoside |
| PM11                              | amikacin                | -10891          | protein synthesis, 30S ribosomal subunit, aminoglycoside |
| PM12                              | paromomycin             | -11604          | protein synthesis, 30S ribosomal subunit, aminoglycoside |
| PM11                              | capreomycin             | -47950          | protein synthesis                                        |
| PM11                              | erythromycin            | -13645          | protein synthesis, 50S ribosomal subunit, macrolide      |
| PM11                              | chloramphenicol         | -15743          | protein synthesis                                        |
| PM13                              | tylosin                 | -9589           | protein synthesis, 50S ribosomal subunit, macrolide      |
| <b>Osmolytes</b>                  |                         |                 |                                                          |
| PM09                              | 3% NaCl                 | -5507           | osmotic sensitivity                                      |
| PM09                              | 4% NaCl                 | -12946          | osmotic sensitivity                                      |
| PM09                              | 5% NaCl                 | -35902          | osmotic sensitivity                                      |
| PM09                              | 5.5% NaCl               | -31073          | osmotic sensitivity                                      |
| PM09                              | 6% NaCl                 | -13963          | osmotic sensitivity                                      |
| PM09                              | 6.5% NaCl               | -21400          | osmotic sensitivity                                      |
| PM09                              | 6% NaCl +X              | -24663          | osmotic sensitivity, NaCl control and with "X"           |
| PM09                              | 6% NaCl +Y              | -27021          | osmotic sensitivity, NaCl control and with "Y"           |
| PM09                              | 5% potassium chloride   | -14031          | osmotic sensitivity                                      |
| PM09                              | 6% potassium chloride   | -35572          | osmotic sensitivity                                      |
| PM09                              | 2% sodium formate       | -9195           | osmotic sensitivity                                      |
| PM09                              | 2% sodium lactate       | -14588          | osmotic sensitivity                                      |
| <b>Others</b>                     |                         |                 |                                                          |
| PM11                              | bleomycin               | -24537          | DNA damage, oxidative, ionizing radiation                |
| PM12                              | vancomycin              | -22730          | Wall                                                     |
| PM13                              | thallium (I) acetate    | -24856          | toxic cation                                             |
| PM13                              | manganese (II) chloride | -7781           | toxic cation                                             |

|      |                       |       |                                                     |
|------|-----------------------|-------|-----------------------------------------------------|
| PM12 | 6-mercapto-purine     | 12793 | inhibits purine nucleotide synthesis and metabolism |
| PM12 | benzethonium chloride | 38475 | toxic cation                                        |

---

**Supplementary Table S2.** List of cryptic prophage genes that are differentially expressed upon adding nalidixic acid (2 µg ml<sup>-1</sup>) and azlocillin (10 µg ml<sup>-1</sup>) for 90 min to *E. coli* K-12 (full data available using GEO accession number GSE23359).

| Gene name     | b-number* | Fold-change (Nalidixic acid) | Fold-change (Azlocillin) | Description                                              |
|---------------|-----------|------------------------------|--------------------------|----------------------------------------------------------|
| <b>DLP12</b>  |           |                              |                          |                                                          |
| <i>emrE</i>   | b0543     | 2.14                         | 2.30                     | Multidrug resistance pump                                |
| <i>ybcN</i>   | b0547     | 3.25                         | 3.25                     | Unknown                                                  |
| <i>ninE</i>   | b0548     | 2.64                         | 2.83                     | Homolog of phage lambda <i>nin</i>                       |
| <i>quuD</i>   | b0551     | 2.64                         | 2.83                     | Unknown                                                  |
| <i>nmpC</i>   | b0553     | -3.03                        | -2.83                    | Outer membrane porin protein                             |
| <i>essD</i>   | b0554     | 2.83                         | 2.64                     | Holin                                                    |
| <i>ybcV</i>   | b0558     | 3.25                         | 3.48                     | Putative an envelope protein                             |
| <i>ybcW</i>   | b0559     | 2.46                         | 2.64                     | Unknown                                                  |
| <i>ylcE</i>   | b0563     | 2.83                         | 2.83                     | Unknown                                                  |
| <b>e14</b>    |           |                              |                          |                                                          |
| <i>intE</i>   | b1140     | 2.30                         | 2.30                     | e14 integrase                                            |
| <i>croE</i>   | b1146     | 2.30                         | 2.30                     | Cro-like repressor                                       |
| <i>ymfM</i>   | b1148     | 2.30                         | 2.30                     | Putative cell division inhibitor                         |
| <i>ycfE</i>   | b1157     | 2.64                         | 2.64                     | Putative tail fiber protein                              |
| <i>pinE</i>   | b1158     | 2.46                         | 2.83                     | DNA invertase, site-specific recombination               |
| <b>rac</b>    |           |                              |                          |                                                          |
| <i>intR</i>   | b1345     | 2.30                         | 2.64                     | rac integrase                                            |
| <i>ydaQ</i>   | b1346     | 2.83                         | 3.03                     | Putative rac excisionase                                 |
| <i>ralR</i>   | b1348     | 2.30                         | 2.64                     | Restriction alleviation and modification enhancement     |
| <i>racC</i>   | b1351     | 2.30                         | 2.64                     | RacC protein                                             |
| <i>kilR</i>   | b1352     | 2.30                         | 2.83                     | Killing function zygotic induction; cell division arrest |
| <i>ydaY</i>   | b1366     | 2.30                         | 2.83                     | Unknown                                                  |
| <b>Qin</b>    |           |                              |                          |                                                          |
| <i>stfQ</i>   | b1547     | 2.46                         | 2.83                     | Side-tail fiber protein                                  |
| <i>ydfO</i>   | b1549     | 2.46                         | 2.64                     | Unknown                                                  |
| <i>ynfN</i>   | b1551     | 2.30                         | 2.83                     | Cold shock-induced protein                               |
| <i>cspI</i>   | b1552     | 2.30                         | 2.83                     | Cold shock-like protein                                  |
| <i>rzpQ</i>   | b1553     | 2.46                         | 3.48                     | Unknown                                                  |
| <i>arrQ</i>   | b1554     | 2.00                         | 2.64                     | Putative lysozyme                                        |
| <i>ydfR</i>   | b1555     | 2.30                         | 2.83                     | Unknown                                                  |
| <i>essQ</i>   | b1556     | 2.30                         | 2.64                     | Putative holin                                           |
| <i>cspB</i>   | b1557     | 2.14                         | 2.64                     | Cold shock-like protein                                  |
| <i>ydfU</i>   | b1560     | 2.14                         | 2.83                     | Unknown                                                  |
| <i>rem</i>    | b1561     | 2.30                         | 2.64                     | Unknown                                                  |
| <i>ydfV</i>   | b1565     | 2.30                         | 2.64                     | Unknown                                                  |
| <i>dicC</i>   | b1569     | 2.30                         | 2.83                     | Regulator of <i>dicB</i>                                 |
| <i>dicF</i>   | b1574     | 2.14                         | 2.46                     | Antisense RNA, inhibits <i>ftsZ</i> translation          |
| <i>dicB</i>   | b1575     | 2.30                         | 2.64                     | Inhibition of cell division                              |
| <i>ydfD</i>   | b1576     | 2.30                         | 2.83                     | Unknown                                                  |
| <i>ydfE</i>   | b1577     | 2.14                         | 2.64                     | Unknown                                                  |
| <b>CP4-44</b> |           |                              |                          |                                                          |
| <i>flu</i>    | b2000     | -3.48                        | -3.25                    | Antigen 43, phase-variable                               |
| <i>yeeU</i>   | b2004     | 2.64                         | 2.64                     | Antitoxin of toxin-antitoxin pair YeeV-YeeU              |
| <b>CPS-53</b> |           |                              |                          |                                                          |
| <i>yfdL</i>   | b2355     | 2.64                         | 2.64                     | Tail fiber protein                                       |
| <i>yfdR</i>   | b2361     | 3.03                         | 3.03                     | Unknown                                                  |
| <i>yfdT</i>   | b2363     | 2.3                          | 2.64                     | Unknown                                                  |
| <b>CP4-57</b> |           |                              |                          |                                                          |
| <i>alpA</i>   | b2624     | 2.46                         | 2.64                     | Putative excisionase                                     |
| <i>yfjJ</i>   | b2626     | 2.64                         | 2.64                     | Unknown                                                  |

b-numbers\* were assigned sequentially along the *E. coli* genome by the Blattner Laboratory as part of the *E. coli* genome project.

**Supplementary Table S3.** Oligonucleotides used for prophage excision by qPCR, for verification of deletions by DNA sequencing, for qRT-PCR, and for one-step inactivation of five of the prophages.

| Purpose                               | Primer sequence (5' to 3')                                                                                                                                       |
|---------------------------------------|------------------------------------------------------------------------------------------------------------------------------------------------------------------|
| <b>qPCR and deletion verification</b> |                                                                                                                                                                  |
| CP4-6                                 | GCATCGCCCGGTTAGTTTTA<br>CACCTGCACTGCCTGATGTC                                                                                                                     |
| DLP12                                 | CAAAAGCCATTGACTCAGCAAGG<br>ACGGATAAGACGGGCATAAATGA                                                                                                               |
| e14                                   | GTGCAAACATCGGTGACGAA<br>TTCAGCAGCTTAGCGCCTTC                                                                                                                     |
| Rac                                   | CTCCAGCATGGTATAGCTGTCTTTAC<br>CAGATTTCTTATGCTGGGCGTTCCG                                                                                                          |
| Qin                                   | CGACAATACGCGCCACATAA<br>AACGGCGAGTAAGTAGTACGCA                                                                                                                   |
| CP4-44                                | GAATTCAGTGTGCGCGAAGG<br>TTGAAGCAATCCAGGGCATC                                                                                                                     |
| CPS-53                                | CGTACTTACCCCGCACTCCA<br>GGCAGTGGCCAAAATTGAA                                                                                                                      |
| CPZ-55                                | AGCACATCCCCGAACG<br>TTGACGAAGTGATTGTCCGC                                                                                                                         |
| CP4-57                                | AAGCATGTAGTACCGAGGATGTAGG<br>TATGTCTCCTCACCGTCTGGTCCG                                                                                                            |
| <b>qRT-PCR</b>                        |                                                                                                                                                                  |
| <i>rrsG</i>                           | TATTGCACAATGGGCGCAAG<br>ACTTAACAAACCGCTGCGT                                                                                                                      |
| <i>rpoS</i>                           | AGAGTAACTTGGCTCTGGTGGTAAA<br>ATAGTACGGGTTTGGTTCATAATCG                                                                                                           |
| <i>oxyR</i>                           | TGAGGTGAAAGTCCTTAAAGAGATG<br>GTCTGTGCTTCATGCAGATACATT                                                                                                            |
| <i>katE</i>                           | GATCTTCTCGATCCAACCAAAC<br>CACCAAGACGACTGATTTGTGT                                                                                                                 |
| <i>kilR</i>                           | CCACGTCAAGTGTGTGACTCC<br>CCGCCTTACAGGTAAACCA                                                                                                                     |
| <i>dicB</i>                           | GGTTGTTTTGAAATTGGTGTCA<br>CATTGTGCACATCCTTTTGG                                                                                                                   |
| <b>Knock-out prophage region</b>      |                                                                                                                                                                  |
| DLP12                                 | <u>ACGACCTTCTAAGTCGTGGGCCGCGAGGTTCTGAATCCTGCAGGGCGCGCCAGTGTAGGCTGGAGCTGCTTC</u><br><u>TGAAGGGCAAAGCGGAAACGGATAAGACGGGCATAAATGAGGAAGAAA</u> CATATGAATATCCTCCTTTAG |
| Qin                                   | <u>CATGAAACACTAACGCTGCGCCGAGCGAATATAACTGGAAATCCATAAGTGTAGGCTGGAGCTGCTTC</u><br><u>ATTTGGTGAAAGCAGCAGTATCGGGATGGCTGGGCACTGCGCTTGAATCATATGAATATCCTCCTTTAG</u>      |
| CP4-6                                 | <u>GCTCAGTTGGTAGAGCAGCGCATTTCGTAATGCGAAGGTCGTAGGTTCCGGTGTAGGCTGGAGCTGCTTC</u><br><u>TTAAATATGGGGTAACTCTTTGATTTAATGGTGCCGATAATAGGAGTCATATGAATATCCTCCTTTAG</u>     |
| CP4-44                                | <u>TCCAGATGACAAACATGATCTCATATCAGGGACTTGTTCGCACCTTCCGTGTAGGCTGGAGCTGCTTC</u><br><u>AAAAAGCTGAAAGCTATGGGCGAAATGAAAAACGGCGAAGCGAAGTAACATATGAATATCCTCCTTTAG</u>      |
| CPZ-55                                | <u>TTGCCGAACAATGTGGTCTTTAGTTTCATAAAGTCGTTCCCTCAGGAAGGTGTAGGCTGGAGCTGCTTC</u><br><u>TTTTGGCGGATCGGTTGTGCCGGTGACGGTGAAATCACTCGCATTTCATATGAATATCCTCCTTTAG</u>       |

\*Underlined region indicates nucleotides at the 5'-end of the prophage containing the right attachment site. Other nucleotides are for homology with pKD4 (source of the kanamycin resistance gene).
